# Supplementary material
Source: PubMed Central journal article supplement (PMC3981938)
Supplement: NIHMS539369-supplement-Supp_Table_S1.pdf [file NIHMS539369-supplement-Supp_Table_S1.pdf]

**Table S1**

| PIP line # | Protein      | Domain         | Species           | PIP                                            | In vitro Ref                                   | Ref of template DNA          | X         | In planta localization Arabidopsis root                      |
|------------|--------------|----------------|-------------------|------------------------------------------------|------------------------------------------------|------------------------------|-----------|--------------------------------------------------------------|
| <b>1</b>   | <b>HRS</b>   | <b>FYVE</b>    | <b>Mouse</b>      | <b>PI3P</b>                                    | <b>Burd and Emr 1998; Simonsen et al. 1998</b> | <b>Gillooly et al., 2000</b> | <b>1x</b> | <b>Late endosome - cytoplasm (weak binding to endosomes)</b> |
| 2          | AtPH1        | PH             | Arabidopsis       | PI3P                                           | Dowler et al. 2000                             | This study                   | 1x        | Cytosol                                                      |
| <b>3</b>   | <b>p40</b>   | <b>PX</b>      | <b>Human</b>      | <b>PI3P</b>                                    | <b>Kanai et al. 2001</b>                       | <b>Kanai et al., 2001</b>    | <b>1x</b> | <b>Late endosome - tonoplast</b>                             |
| 4          | OSH2         | PH             | Human             | PI4P                                           | Yu et al. 2004                                 | Roy and Levine 2004          | 1x        | Not stable                                                   |
| <b>5</b>   | <b>FAPP1</b> | <b>PH</b>      | <b>Yeast (Sc)</b> | <b>PI4P</b>                                    | <b>Dowler et al. 2000</b>                      | <b>Levine and Munro 2002</b> | <b>1x</b> | <b>PM – Golgi - post-Golgi/endosomal – weak cytoplasm</b>    |
| 6          | Atg26        | GRAM           | P. pastoris       | PI4P                                           | Yamashita et al. 2006                          | Farré et al., 2007           | 1x        | Not stable                                                   |
| <b>7</b>   | <b>OSBP</b>  | <b>PH</b>      | <b>Human</b>      | <b>PI4P</b>                                    | <b>Dowler et al. 2000</b>                      | Levine and Munro 2002        | <b>1x</b> | <b>PM and weak cytoplasm</b>                                 |
| 8          | ING2         | ING            | Human             | PI5P                                           | Gozani et al. 2003                             | Gozani et al., 2003          | 3x        | Nucleus                                                      |
| 9          | p47          | PX             | Human             | PI(3,4)P <sub>2</sub>                          | Kanai et al. 2001                              | Kanai et al., 2001           | 1x        | Cytosol                                                      |
| 10         | TAPP1        | PH             | Human             | PI(3,4)P <sub>2</sub>                          | Dowler et al. 2000                             | Marshall et al, 2002         | 1x        | Cytosol                                                      |
| 11         | TAPP2        | PH             | Mouse             | PI(3,4)P <sub>2</sub>                          | Dowler et al. 2000                             | Marshall et al, 2002         | 1x        | Cytosol                                                      |
| 12         | Ent3p        | ENTH           | Yeast (Sc)        | PI(3,5)P <sub>2</sub>                          | Friant et al. 2003                             | Friant et al., 2003          | 1x        | Cytosol/Nucleus                                              |
| 13         | Ent5p        | ENTH           | Yeast (Sc)        | PI(3,5)P <sub>2</sub>                          | Eugster et al., 2004                           | Eugster et al., 2004         | 1x        | Not stable                                                   |
| <b>14</b>  | <b>PLCδ1</b> | <b>PH</b>      | <b>Rat</b>        | <b>PI(4,5)P<sub>2</sub></b>                    | <b>Lemmon et al. 1995</b>                      | <b>Levine and Munro 2002</b> | <b>1x</b> | <b>PM - cytoplasm (strong cytoplasm, weak PM)</b>            |
| <b>15</b>  | <b>TUBBY</b> | <b>TUBBY-C</b> | <b>Human</b>      | <b>PI(4,5)P<sub>2</sub></b>                    | <b>Santagata et al. 2001</b>                   | <b>Santagata et al, 2001</b> | <b>1x</b> | <b>PM – nucleus - weak cytoplasm</b>                         |
| 16         | AKT          | PH             | Human             | PI(3,4)P <sub>2</sub> /PI(3,4,5)P <sub>3</sub> | Franke et al. 1997                             | Kwon et al., 2007            | 1x        | Not stable in planta                                         |
| 17         | BTK          | PH             | Human             | PI(3,4,5)P <sub>3</sub>                        | Salim et al. 1996; Rameh et al. 1997           | Johannessen et al., 2010     | 1x        | Cytoplasm                                                    |
| <b>18</b>  | <b>HRS</b>   | <b>FYVE</b>    | <b>Mouse</b>      | <b>PI3P</b>                                    | <b>Gillooly et al., 2000</b>                   | <b>Gillooly et al., 2000</b> | <b>2x</b> | <b>Late endosome – tonoplast in some cells</b>               |
| 19         | AtPH1        | PH             | Arabidopsis       | PI3P                                           |                                                | This study                   | 2x        | Not stable                                                   |
| 20         | OSH2         | PH             | Human             | PI4P                                           |                                                | Levine and Munro 2002        | 2x        | Not stable                                                   |
| <b>21</b>  | <b>FAPP1</b> | <b>PH</b>      | <b>Yeast (Sc)</b> | <b>PI4P</b>                                    | <b>Godi et al. 2004</b>                        | <b>This study</b>            | <b>2x</b> | <b>PM – weak endosomal</b>                                   |
| 22         | Atg26        | GRAM           | P. pastoris       | PI4P                                           |                                                | This study                   | 2x        | Not stable                                                   |
| 23         | OSBP         | PH             | Human             | PI4P                                           |                                                | This study                   | 2x        | Not stable in planta                                         |
| <b>24</b>  | <b>PLCδ1</b> | <b>PH</b>      | <b>Rat</b>        | <b>PI(4,5)P<sub>2</sub></b>                    |                                                | <b>Levine and Munro 2002</b> | <b>2x</b> | <b>PM (strong PM, weak cytoplasm)</b>                        |
| 25         | TUBBY        | TUBBY-C        | Human             | PI(4,5)P <sub>2</sub>                          |                                                | This study                   | 2x        | Not stable in planta                                         |

**References from Table S1:**

- Burd, C. G., & Emr, S. D. (1998). Phosphatidylinositol(3)-phosphate signaling mediated by specific binding to RING FYVE domains. *Molecular cell*, 2(1), 157–162.
- Dowler, S., Currie, R. A., Campbell, D. G., Deak, M., Kular, G., Downes, C. P., & Alessi, D. R. (2000). Identification of pleckstrin-homology-domain-containing proteins with novel phosphoinositide-binding specificities. *Biochemical Journal*, 351(Pt 1), 19–31.
- Eugster, A., Pécheur, E.-I., Michel, F., Winsor, B., Letourneur, F., & Friant, S. (2004). Ent5p is

- required with Ent3p and Vps27p for ubiquitin-dependent protein sorting into the multivesicular body. *Molecular biology of the cell*, 15(7), 3031–3041. doi:10.1091/mbc.E03-11-0793
- Farré, J.-C., Vidal, J., & Subramani, S. (2007). A cytoplasm to vacuole targeting pathway in *P. pastoris*. *Autophagy*, 3(3), 230–234.
- Franke, T. F., Kaplan, D. R., Cantley, L. C., & Toker, A. (1997). Direct Regulation of the Akt Proto-Oncogene Product by Phosphatidylinositol-3,4-bisphosphate. *Science (New York, NY)*, 275(5300), 665–668. doi:10.1126/science.275.5300.665
- Friant, S., Pécheur, E. I., Eugster, A., Michel, F., Lefkir, Y., Nourrisson, D., & Letourneur, F. (2003). Ent3p Is a PtdIns(3,5)P<sub>2</sub> effector required for protein sorting to the multivesicular body. *Developmental Cell*, 5(3), 499–511.
- Gillooly, D. J., Morrow, I. C., Lindsay, M., Gould, R., Bryant, N. J., Gaullier, J. M., et al. (2000). Localization of phosphatidylinositol 3-phosphate in yeast and mammalian cells. *The EMBO Journal*, 19(17), 4577–4588. doi:10.1093/emboj/19.17.4577
- Godi, A., Campi, A. D., Konstantakopoulos, A., Tullio, G. D., Alessi, D. R., Kular, G. S., et al. (2004). FAPPs control Golgi-to-cell-surface membrane traffic by binding to ARF and PtdIns(4)P. *Nature Cell Biology*, 6(5), 393–404. doi:10.1038/ncb1119
- Gozani, O., Karuman, P., Jones, D. R., Ivanov, D., Cha, J., Lugovskoy, A. A., et al. (2003). The PHD finger of the chromatin-associated protein ING2 functions as a nuclear phosphoinositide receptor. *Cell*, 114(1), 99–111.
- Johannessen, C. M., Boehm, J. S., Kim, S. Y., Thomas, S. R., Wardwell, L., Johnson, L. A., et al. (2010). COT drives resistance to RAF inhibition through MAP kinase pathway reactivation. *Nature*, 468(7326), 968–972. doi:10.1038/nature09627
- Kanai, F., Liu, H., Field, S. J., Akbary, H., Matsuo, T., Brown, G. E., et al. (2001). The PX domains of p47phox and p40phox bind to lipid products of PI(3)K. *Nature Cell Biology*, 3(7), 675–678. doi:10.1038/35083070
- Kwon, Y., Hofmann, T., & Montell, C. (2007). Integration of phosphoinositide- and calmodulin-mediated regulation of TRPC6. *Molecular cell*, 25(4), 491–503. doi:10.1016/j.molcel.2007.01.021
- Lemmon, M. A., Ferguson, K. M., O'Brien, R., Sigler, P. B., & Schlessinger, J. (1995). Specific and high-affinity binding of inositol phosphates to an isolated pleckstrin homology domain. *Proceedings of the National Academy of Sciences of the United States of America*, 92(23), 10472–10476.
- Levine, T. P., & Munro, S. (2002). Targeting of Golgi-specific pleckstrin homology domains involves both PtdIns 4-kinase-dependent and -independent components. *Current Biology*, 12(9), 695–704.
- Marshall, A. J., Krahn, A. K., Ma, K., Duronio, V., & Hou, S. (2002). TAPP1 and TAPP2 are targets of phosphatidylinositol 3-kinase signaling in B cells: sustained plasma membrane recruitment triggered by the B-cell antigen receptor. *Molecular and cellular biology*, 22(15), 5479–5491.
- Rameh, L. E., Arvidsson, A.-K., Carraway, K. L., Couvillon, A. D., Rathbun, G., Crompton, A., et al. (1997). A comparative analysis of the phosphoinositide binding specificity of pleckstrin homology domains. *The Journal of biological chemistry*, 272(35), 22059–22066.
- Roy, A., & Levine, T. P. (2004). Multiple Pools of Phosphatidylinositol 4-Phosphate Detected Using the Pleckstrin Homology Domain of Osh2p. *The Journal of biological chemistry*, 279(43), 44683–44689. doi:10.1074/jbc.M401583200
- Salim, K., Bottomley, M. J., Querfurth, E., Zvelebil, M. J., Gout, I., Scaife, R., et al. (1996). Distinct specificity in the recognition of phosphoinositides by the pleckstrin homology domains of dynamin and Bruton's tyrosine kinase. *The EMBO Journal*, 15(22), 6241.
- Santagata, S., Boggon, T. J., Baird, C. L., Gomez, C. A., Zhao, J., Shan, W. S., et al. (2001). G-protein signaling through tubby proteins. *Science (New York, NY)*, 292(5524), 2041–2050. doi:10.1126/science.1061233
- Simonsen, A., Lippé, R., Christoforidis, S., Gaullier, J. M., Brech, A., Callaghan, J., et al. (1998). EEA1 links PI(3)K function to Rab5 regulation of endosome fusion. *Nature*, 394(6692), 494–498. doi:10.1038/28879
- Yamashita, S. I., Oku, M., Wasada, Y., Ano, Y., & Sakai, Y. (2006). PI4P-signaling pathway for the synthesis of a nascent membrane structure in selective autophagy. *The Journal of Cell Biology*, 173(5), 709–717. doi:10.1083/jcb.200512142
- Yu, J. W., Mendrola, J. M., Audhya, A., Singh, S., Keleti, D., Dewald, D. B., et al. (2004). Genome-wide analysis of membrane targeting by *S. cerevisiae* pleckstrin homology domains. *Molecular cell*, 13(5), 677–688.
