# Supplementary material
Source: PubMed Central journal article supplement (PMC3981938)
Supplement: NIHMS539369-supplement-Supp_Table_S3.pdf [file NIHMS539369-supplement-Supp_Table_S3.pdf]

| vector constructed                 | Primer name         | Primer sequence                                             |
|------------------------------------|---------------------|-------------------------------------------------------------|
| 2xCHERRY-4xMYC/pDONRP2R-P3         | Myc-B3              | GGGGACAACCTTTGTATAATAAAGTTGCTCAATTCAAGTCCTCTTCAGAAATGAGC    |
|                                    | CHERRY-B2R          | GGGGACAGCTTTCTTGACAAAAGTGGCTCTCGAGGAATTCGGTACC              |
| 2xCHERRY-1xMYC/noSTOPpDONRP2R-P4   | mCHERRY-B1wATGKOZAK | GGGGACAAGTTTGTACAAAAAAGCAGGCTTAACCATGCTCGAGGAATTCGGTACC     |
|                                    | Myc-B2noSTOP        | GGGGACCACTTTGTACAAGAAAGCTGGGTAATTCAAGTCCTCTTCAGA            |
| 2xCyPET-3xFlag-6HisnoSTOP/pDONR221 | HellFire-B2noSTOP   | GGGGACCACTTTGTACAAGAAAGCTGGGTACTTGTTCATCGTCATCCTT           |
|                                    | CyPET-B1wATGKOZAK   | GGGGACAAGTTTGTACAAAAAAGCAGGCTTAACCATGCTCGAGGAATTCGGTACC     |
| 2xCyPET-3xFlag-6His/pDONRP2R-P3    | HellFire-B3         | GGGGACAACCTTTGTATAATAAAGTTGCCTACTTGTTCATCGTCATCCTTGTAGTCGAT |
|                                    | CyPET-B2R           | GGGGACAGCTTTCTTGACAAAAGTGGCTCTCGAGGAATTCGGTACC              |

**Table S3.** Primers used for cloning of the fluorescent protein reporters.
