# Supplementary material
Source: PubMed Central journal article supplement (PMC3981938)
Supplement: NIHMS539369-supplement-Supp_Table_S4.pdf [file NIHMS539369-supplement-Supp_Table_S4.pdf]

| Construct name | Construct                           | 5' fragment (pDONRP4-P1R - KanamycinR) | middle fragment (pDONR221 - KanamycinR) | 3' fragment (in pDONRP2R-P3 - KanamycinR) | Destination vector (SpectinomycinR) | Reisittance in plants |
|----------------|-------------------------------------|----------------------------------------|-----------------------------------------|-------------------------------------------|-------------------------------------|-----------------------|
| <b>P1Y</b>     | UBQ10prom::CITRINE-1xFYVE(HRS)      | UBQ10prom / pDONRP4-P1R                | mCITRINEnoSTOP / pDONR221               | 1xFYVEp3'                                 | pB7m34GW                            | Basta                 |
| <b>P2Y</b>     | UBQ10prom::CITRINE-1xPH(AtPH1)      | UBQ10prom / pDONRP4-P1R                | mCITRINEnoSTOP / pDONR221               | 1xAtPH1p3'                                | pB7m34GW                            | Basta                 |
| <b>P3Y</b>     | UBQ10prom::1xPX(p40)-CITRINE        | UBQ10prom / pDONRP4-P1R                | 1xp40p221                               | mCITRINE / pDONRP2R-P3                    | pB7m34GW                            | Basta                 |
| <b>P4Y</b>     | UBQ10prom::CITRINE-1xPH(OSH2)       | UBQ10prom / pDONRP4-P1R                | mCITRINEnoSTOP / pDONR221               | 1xOSH2p3'                                 | pB7m34GW                            | Basta                 |
| <b>P5Y</b>     | UBQ10prom::CITRINE-1xPH(FAPP1)      | UBQ10prom / pDONRP4-P1R                | mCITRINEnoSTOP / pDONR221               | 1xFAPP1p3'                                | pB7m34GW                            | Basta                 |
| <b>P6Y</b>     | UBQ10prom::CITRINE-1xGRAM(Atg26)    | UBQ10prom / pDONRP4-P1R                | mCITRINEnoSTOP / pDONR221               | 1xGRAMp3'                                 | pB7m34GW                            | Basta                 |
| <b>P7Y</b>     | UBQ10prom::CITRINE-1xPH(OSBP)       | UBQ10prom / pDONRP4-P1R                | mCITRINEnoSTOP / pDONR221               | 1xOSBPp3'                                 | pB7m34GW                            | Basta                 |
| <b>P8Y</b>     | UBQ10prom::CITRINE-1xPHD(ING2)      | UBQ10prom / pDONRP4-P1R                | mCITRINEnoSTOP / pDONR221               | 3xING2p3'                                 | pB7m34GW                            | Basta                 |
| <b>P9Y</b>     | UBQ10prom::1xPX(p47)-CITRINE        | UBQ10prom / pDONRP4-P1R                | 1xp47p221                               | mCITRINE / pDONRP2R-P3                    | pB7m34GW                            | Basta                 |
| <b>P10Y</b>    | UBQ10prom::CITRINE-1xPH(TAPP1)      | UBQ10prom / pDONRP4-P1R                | mCITRINEnoSTOP / pDONR221               | 1xTAPP1p3'                                | pB7m34GW                            | Basta                 |
| <b>P11Y</b>    | UBQ10prom::CITRINE-1xPH(TAPP2)      | UBQ10prom / pDONRP4-P1R                | mCITRINEnoSTOP / pDONR221               | 1xTAPP2p3'                                | pB7m34GW                            | Basta                 |
| <b>P12Y</b>    | UBQ10prom::1xENTH(Ent3p)-CITRINE    | UBQ10prom / pDONRP4-P1R                | 1xEnt3p221                              | mCITRINE / pDONRP2R-P3                    | pB7m34GW                            | Basta                 |
| <b>P13Y</b>    | UBQ10prom::1xENTH(Ent5p)-CITRINE    | UBQ10prom / pDONRP4-P1R                | 1xEnt5p221                              | mCITRINE / pDONRP2R-P3                    | pB7m34GW                            | Basta                 |
| <b>P14Y</b>    | UBQ10prom::CITRINE-1xPH(PLCd1)      | UBQ10prom / pDONRP4-P1R                | mCITRINEnoSTOP / pDONR221               | 1xPLCp3'                                  | pB7m34GW                            | Basta                 |
| <b>P15Y</b>    | UBQ10prom::CITRINE-1xTUBBY-C(TUBBY) | UBQ10prom / pDONRP4-P1R                | mCITRINEnoSTOP / pDONR221               | 1xTUBBYp3'                                | pB7m34GW                            | Basta                 |
| <b>P16Y</b>    | UBQ10prom::1xPH(AKT)-CITRINE        | UBQ10prom / pDONRP4-P1R                | 1xAKTp221                               | mCITRINE / pDONRP2R-P3                    | pB7m34GW                            | Basta                 |
| <b>P17Y</b>    | UBQ10prom::1xPH(BTK)-CITRINE        | UBQ10prom / pDONRP4-P1R                | 1xBTKp221                               | mCITRINE / pDONRP2R-P3                    | pB7m34GW                            | Basta                 |
| <b>P18Y</b>    | UBQ10prom::CITRINE-2xFYVE(HRS)      | UBQ10prom / pDONRP4-P1R                | mCITRINEnoSTOP / pDONR221               | 2xFYVEp3'                                 | pB7m34GW                            | Basta                 |
| <b>P19Y</b>    | UBQ10prom::CITRINE-2xPH(AtPH1)      | UBQ10prom / pDONRP4-P1R                | mCITRINEnoSTOP / pDONR221               | 2xAtPH1p3'                                | pB7m34GW                            | Basta                 |
| <b>P20Y</b>    | UBQ10prom::CITRINE-2xPH(OSH2)       | UBQ10prom / pDONRP4-P1R                | mCITRINEnoSTOP / pDONR221               | 2xOSH2p3'                                 | pB7m34GW                            | Basta                 |
| <b>P21Y</b>    | UBQ10prom::CITRINE-2xPH(FAPP1)      | UBQ10prom / pDONRP4-P1R                | mCITRINEnoSTOP / pDONR221               | 2xFAPP1p3'                                | pB7m34GW                            | Basta                 |
| <b>P22Y</b>    | UBQ10prom::CITRINE-2xGRAM(Atg26)    | UBQ10prom / pDONRP4-P1R                | mCITRINEnoSTOP / pDONR221               | 2xGRAMp3'                                 | pB7m34GW                            | Basta                 |
| <b>P23Y</b>    | UBQ10prom::CITRINE-2xPH(OSBP)       | UBQ10prom / pDONRP4-P1R                | mCITRINEnoSTOP / pDONR221               | 2xOSBPp3'                                 | pB7m34GW                            | Basta                 |
| <b>P24Y</b>    | UBQ10prom::CITRINE-2xPH(PLCd1)      | UBQ10prom / pDONRP4-P1R                | mCITRINEnoSTOP / pDONR221               | 2xPLCp3'                                  | pB7m34GW                            | Basta                 |
| <b>P25Y</b>    | UBQ10prom::CITRINE-2xTUBBY-C(TUBBY) | UBQ10prom / pDONRP4-P1R                | mCITRINEnoSTOP / pDONR221               | 2xTUBBYp3'                                | pB7m34GW                            | Basta                 |

| Construct name | Construct                            | 5' fragment (pDONRP4-P1R - KanamycinR) | middle fragment (pDONR221 - KanamycinR) | 3' fragment (in pDONRP2R-P3 - KanamycinR) | Destination vector (SpectinomycinR) | Reisitance in plants |
|----------------|--------------------------------------|----------------------------------------|-----------------------------------------|-------------------------------------------|-------------------------------------|----------------------|
| <b>P1R</b>     | UBQ10prom::2xCHERRY-1xFYVE(HRS)      | UBQ10prom / pDONRP4-P1R                | 2xmCHERRY-1xMYCnoSTOP / pDONR221        | 1xFYVEp3'                                 | pH7m34GW                            | Hygromycin           |
| <b>P3R</b>     | UBQ10prom::1xPX(p40)-2xCHERRY        | UBQ10prom / pDONRP4-P1R                | 1xp40p221                               | 2xmCHERRY-4xMYC / pDONRP2R-P3             | pH7m34GW                            | Hygromycin           |
| <b>P5R</b>     | UBQ10prom::2xCHERRY-1xPH(FAPP1)      | UBQ10prom / pDONRP4-P1R                | 2xmCHERRY-1xMYCnoSTOP / pDONR221        | 1xFAPP1p3'                                | pH7m34GW                            | Hygromycin           |
| <b>P7R</b>     | UBQ10prom::2xCHERRY-1xPH(OSBP)       | UBQ10prom / pDONRP4-P1R                | 2xmCHERRY-1xMYCnoSTOP / pDONR221        | 1xOSBPp3'                                 | pH7m34GW                            | Hygromycin           |
| <b>P14R</b>    | UBQ10prom::2xCHERRY-1xPH(PLCd1)      | UBQ10prom / pDONRP4-P1R                | 2xmCHERRY-1xMYCnoSTOP / pDONR221        | 1xPLCp3'                                  | pH7m34GW                            | Hygromycin           |
| <b>P15R</b>    | UBQ10prom::2xCHERRY-1xTUBBY-C(TUBBY) | UBQ10prom / pDONRP4-P1R                | 2xmCHERRY-1xMYCnoSTOP / pDONR221        | 1xTUBBYp3'                                | pH7m34GW                            | Hygromycin           |
| <b>P18R</b>    | UBQ10prom::2xCHERRY-2xFYVE(HRS)      | UBQ10prom / pDONRP4-P1R                | 2xmCHERRY-1xMYCnoSTOP / pDONR221        | 2xFYVEp3'                                 | pH7m34GW                            | Hygromycin           |
| <b>P21R</b>    | UBQ10prom::2xCHERRY-2xPH(FAPP1)      | UBQ10prom / pDONRP4-P1R                | 2xmCHERRY-1xMYCnoSTOP / pDONR221        | 2xFAPP1p3'                                | pH7m34GW                            | Hygromycin           |
| <b>P23R</b>    | UBQ10prom::2xCHERRY-2xPH(OSBP)       | UBQ10prom / pDONRP4-P1R                | 2xmCHERRY-1xMYCnoSTOP / pDONR221        | 2xOSBPp3'                                 | pH7m34GW                            | Hygromycin           |
| <b>P24R</b>    | UBQ10prom::2xCHERRY-2xPH(PLCd1)      | UBQ10prom / pDONRP4-P1R                | 2xmCHERRY-1xMYCnoSTOP / pDONR221        | 2xPLCp3'                                  | pH7m34GW                            | Hygromycin           |
| <b>P25R</b>    | UBQ10prom::2xCHERRY-2xTUBBY-C(TUBBY) | UBQ10prom / pDONRP4-P1R                | 2xmCHERRY-1xMYCnoSTOP / pDONR221        | 2xTUBBYp3'                                | pH7m34GW                            | Hygromycin           |

| Construct name | Construct                                  | 5' fragment (pDONRP4-P1R - KanamycinR) | middle fragment (pDONR221 - KanamycinR)      | 3' fragment (in pDONRP2R-P3 - KanamycinR) | Destination vector (SpectinomycinR) | Reisittance in plants |
|----------------|--------------------------------------------|----------------------------------------|----------------------------------------------|-------------------------------------------|-------------------------------------|-----------------------|
| <b>P1C</b>     | <i>UBQ10prom::2xCyPet-1xFYVE(HRS)</i>      | <i>UBQ10prom / pDONRP4-P1R</i>         | <i>2xCyPet-3xFLAG-6xHISnoSTOP / pDONR221</i> | <i>1xFYVEp3'</i>                          | <i>pK7m34GW</i>                     | Kanamycin             |
| <b>P3C</b>     | <i>UBQ10prom::1xPX(p40)-2xCyPet</i>        | <i>UBQ10prom / pDONRP4-P1R</i>         | <i>1xp40p221</i>                             | <i>2xCyPet-3xFLAG-6xHIS / pDONRP2R-P3</i> | <i>pK7m34GW</i>                     | Kanamycin             |
| <b>P5C</b>     | <i>UBQ10prom::2xCyPet-1xPH(FAPP1)</i>      | <i>UBQ10prom / pDONRP4-P1R</i>         | <i>2xCyPet-3xFLAG-6xHISnoSTOP / pDONR221</i> | <i>1xFAPP1p3'</i>                         | <i>pK7m34GW</i>                     | Kanamycin             |
| <b>P7C</b>     | <i>UBQ10prom::2xCyPet-1xPH(OSBP)</i>       | <i>UBQ10prom / pDONRP4-P1R</i>         | <i>2xCyPet-3xFLAG-6xHISnoSTOP / pDONR221</i> | <i>1xOSBPp3'</i>                          | <i>pK7m34GW</i>                     | Kanamycin             |
| <b>P14C</b>    | <i>UBQ10prom::2xCyPet-1xPH(PLCd1)</i>      | <i>UBQ10prom / pDONRP4-P1R</i>         | <i>2xCyPet-3xFLAG-6xHISnoSTOP / pDONR221</i> | <i>1xPLCp3'</i>                           | <i>pK7m34GW</i>                     | Kanamycin             |
| <b>P15C</b>    | <i>UBQ10prom::2xCyPet-1xTUBBY-C(TUBBY)</i> | <i>UBQ10prom / pDONRP4-P1R</i>         | <i>2xCyPet-3xFLAG-6xHISnoSTOP / pDONR221</i> | <i>1xTUBBYp3'</i>                         | <i>pK7m34GW</i>                     | Kanamycin             |
| <b>P18C</b>    | <i>UBQ10prom::2xCyPet-2xFYVE(HRS)</i>      | <i>UBQ10prom / pDONRP4-P1R</i>         | <i>2xCyPet-3xFLAG-6xHISnoSTOP / pDONR221</i> | <i>2xFYVEp3'</i>                          | <i>pK7m34GW</i>                     | Kanamycin             |
| <b>P21C</b>    | <i>UBQ10prom::2xCyPet-2xPH(FAPP1)</i>      | <i>UBQ10prom / pDONRP4-P1R</i>         | <i>2xCyPet-3xFLAG-6xHISnoSTOP / pDONR221</i> | <i>2xFAPP1p3'</i>                         | <i>pK7m34GW</i>                     | Kanamycin             |
| <b>P23C</b>    | <i>UBQ10prom::2xCyPet-2xPH(OSBP)</i>       | <i>UBQ10prom / pDONRP4-P1R</i>         | <i>2xCyPet-3xFLAG-6xHISnoSTOP / pDONR221</i> | <i>2xOSBPp3'</i>                          | <i>pK7m34GW</i>                     | Kanamycin             |
| <b>P24C</b>    | <i>UBQ10prom::2xCyPet-2xPH(PLCd1)</i>      | <i>UBQ10prom / pDONRP4-P1R</i>         | <i>2xCyPet-3xFLAG-6xHISnoSTOP / pDONR221</i> | <i>2xPLCp3'</i>                           | <i>pK7m34GW</i>                     | Kanamycin             |
| <b>P25C</b>    | <i>UBQ10prom::2xCyPet-2xTUBBY-C(TUBBY)</i> | <i>UBQ10prom / pDONRP4-P1R</i>         | <i>2xCyPet-3xFLAG-6xHISnoSTOP / pDONR221</i> | <i>2xTUBBYp3'</i>                         | <i>pK7m34GW</i>                     | Kanamycin             |

**Table S4.** Table recapitulating all the transgenic lines included in the PIPIline marker set.
